# Supplementary material for: Targeted long-read sequencing identifies missing pathogenic variants in unsolved Werner syndrome cases
Source: HighWire-hosted journal article supplement (doi:10.1136/jmedgenet-2022-108485), 2022-05-09
Supplement: jmedgenet-2022-108485supp001_data_supplement.pdf [file jmedgenet-2022-108485supp001_data_supplement.pdf]

## SUPPLEMENTARY MATERIALS

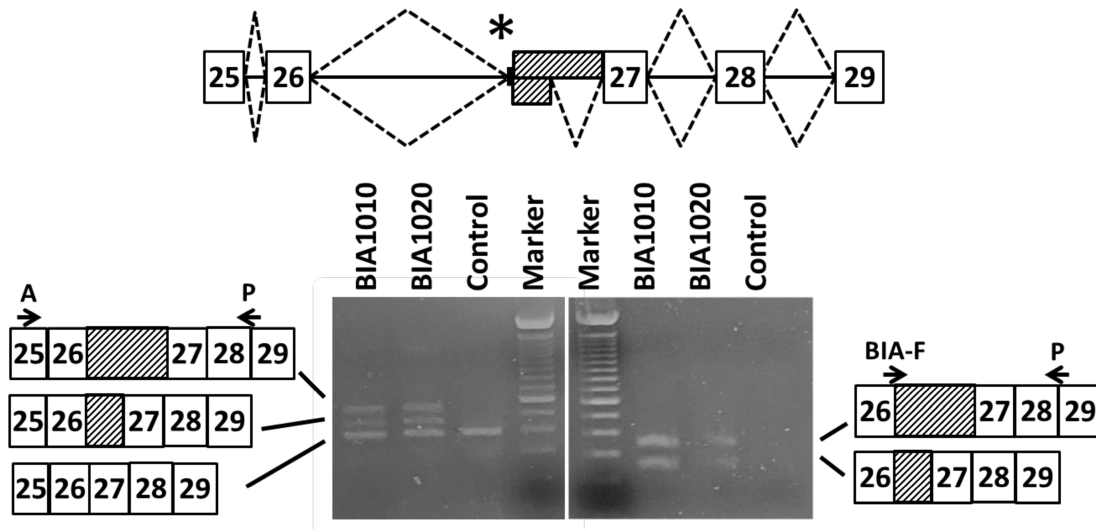

**Supplemental Figure 1. A splice variant results in a cryptic exon within *WRN* in the BIA pedigree.** RT-PCR of BIA1010 and BIA1020, both of whom are heterozygous for c.3234-170A>G in intron 26 (as shown by the asterisk (\*) on top diagram), showed larger products using the primer design from exon 25 (A: 5'-ATCGGCAAGGATCAAACAGAGAG-3') and exons 28-29 (P:5'-TTCTGGTGACTGTACCATGATAC-3') (left panel). Using a primer designed from exon 26 and cryptic splice acceptor site (BIA-F 5'-GCTTCTGCCTAGACATCTTAAAGC-3'), two unique RT-PCR products were detected in both affected patients (right panel).



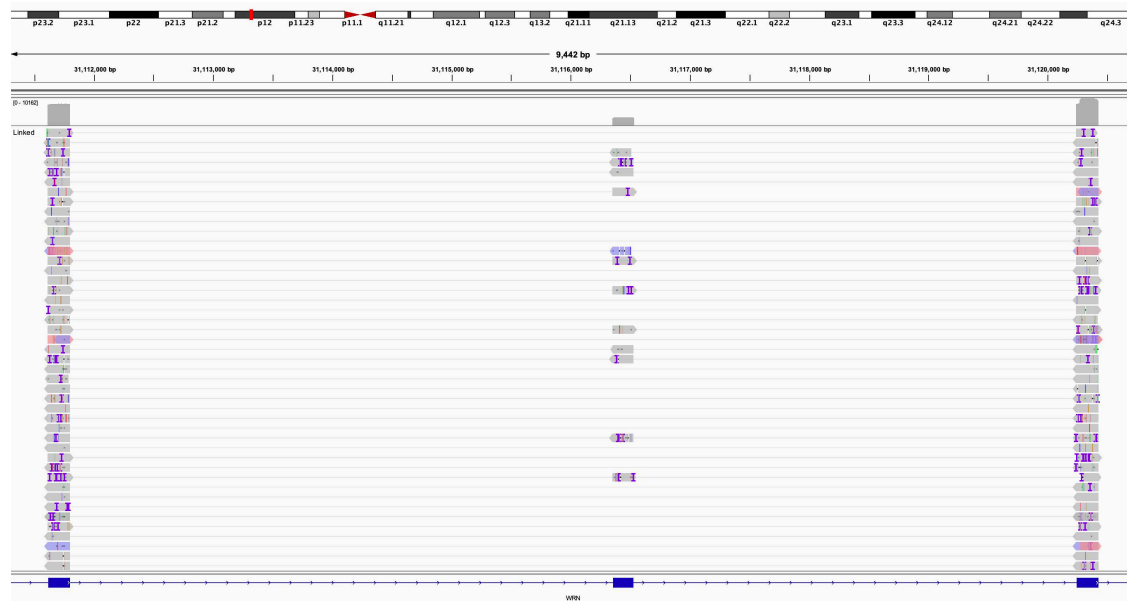

### Supplemental Figure 3. IGV view of long-read whole-genome sequencing of rtPCR

**products from SILV1010.** Exons 19–21 are shown at the bottom and reads are represented by gray boxes. Linked reads are shown by thin lines connecting the gray boxes over the exons. Note that coverage is approximately half for exon 20 when compared to exons 19 and 21. Exon skipping of 20 was known in this sample.

| <b>Sample</b> | <b>Estimated coverage of target region</b> |
|---------------|--------------------------------------------|
| WV            | 28.3                                       |
| BIA1010       | n/a                                        |
| BIA1020       | 25.6                                       |
| PD1010        | 18.4                                       |
| CB4           | 13.3                                       |
| CB6           | 20.2                                       |
| FES           | 15.4                                       |
| SILV1010      | 22.9                                       |
| EN1010        | 14.3                                       |

**Supplemental Table 1. Estimated coverage of each sample.**

| <b>Gene or Region</b> | <b>Chromosome</b> | <b>Start</b> | <b>End</b>  |
|-----------------------|-------------------|--------------|-------------|
| FMR1                  | X                 | 147,400,000  | 148,500,000 |
| WRN                   | 8                 | 29,900,000   | 33,700,000  |
| COL1A1                | 17                | 49,650,000   | 50,750,000  |

**Supplemental Table 2. Regions targeted for adaptive sampling on the Oxford Nanopore Technologies (ONT) platform using GRCh38 coordinates. Target region is WRN, while control regions are FMR1 and COL1A1.**

| Registry         | Variant            | CADD score | SpliceAI prediction | SpliceAI score |
|------------------|--------------------|------------|---------------------|----------------|
| BIA1010, BIA1020 | c.3234-170A>G      | 9.556      | Acceptor site gain  | 0.32           |
| CB4, CB6         | c.1982-297A>G      | 11.89      | Donor site gain     | 0.84           |
| EN1010           | c.839+1309T>G      | 9.358      | Donor site gain     | 0.73           |
| WV               | c.361C>T, p.R1321* | 44         | NA                  | NA             |

**Supplemental Table 3. CADD and SpliceAI scores for single nucleotide variants identified in this study. NA, not applicable.**

**Supplemental File 1.** Sequences of the intronic variants and activated splice sites found in this study.
