# Supplementary material for: Targeted long-read sequencing identifies missing pathogenic variants in unsolved Werner syndrome cases
Source: HighWire-hosted journal article supplement (doi:10.1136/jmedgenet-2022-108485), 2022-05-09
Supplement: jmedgenet-2022-108485supp002_data_supplement.pdf [file jmedgenet-2022-108485supp002_data_supplement.pdf]

Intronic variants (red), activated splice sites (blue) and region of cryptic insertion (gray) are shown with respect to WRN exons (yellow). See text for details.

**c. 839+1309T>G (Registry#EN1010)**

```

42841 ttaatgaagt ggctaaatga atatctctgc tttgtggttt gaaaattaat attgattttt
42901 tttcccccta gaggaagaaa tcctacttag cgacatgaac aaacagttga cttcaatctc
E8 42961 tgaggaagtg atggatctgg ctaagcatct tcctcatgct ttcagtaaa tgaaaaacc
43021 acggaggtta aatattacct tttttttttt taacttaaat caattctggt tattttttta
43081 tcacattttc ctatatgtga agaatactat tcattaaggc tgactcatag aaatttgctt
43141 gaatacacac acacagactg atgcataaat ttgagaaata tctttccagt tgttgaatag
43201 tgaatccaaa ggtttaagcc ttttctgtct gctttgtagg atgttttatg aaacaaagga
43261 atagaaattg tattcatatt atacattttg aaattatata tatattatat tttttgtcaa
43321 agcaaaataa attatacatt aagggaaaata ttttaagattc aaagtgtgtca ttttctttct
43381 gttaatgagt atctttgatt taataacatt tatagtttg tcaactgaaa tctatagtga
43441 ccaaagcaa tgcataatgt agtagcctca tttctgttac tatctgatta ttacttaaga
43501 atttacttta attaatagat tattagaaca aaaggcattc caattttaga gattctttta
43561 tggttaaagc actaggtaac ttaaaaaaatt tggatcaaat gttatacaga ttaatagacc
43621 ttggaataca ggggctatgt ctttttgtaa tcagaccttg tcctggcctt aattgcagga
43681 tgacttctct attaaatctc taaaagcagg aatgctctgg aacaatgaac aattagaatg
43741 tggtaatgta attttgggcc aaaaaaactt ttgtagaaat gtgattctct tacttggaa
43801 agaaagaatt ctgactcgaa aaagtgcact taatgtatgc ttttctgggt aagattttgtg
43861 atagattttg attgagattt aaaaccatga tatataaatt tagctttttt gtcaaagtaa
43921 tttgccaccc tagaatttgt gttggtaatt tttaatgcaa cttggacaat ttctgaaaga
43981 tgtaactttc ttttttttga gacgagtctc gctttgttgc ccaggctgga gtgcagtgac
44041 atgatctcag gtcactgcaa gctccgcctc ccgggttcac accattatcc tgcctcagcc
44101 tcccagtagt ctgggactac cgggcgccgc caccacacct ggctaatttt ttttttattt
44161 ttagtagaga cggggtttca ccgtgtttag caggatcgtc tcgatctccg gacctcgtga
44221 tctgcccgc tcagcctccc aaagtgcctgg gattacaggc gttagccacc gcccagcc
44281 tgaaagatga actttaaaat ggggaaggat actagtaaag ccatttctta ctcagtata
44341 cttttttccc tccatgaaat tagagcagcc accttttaca tgacttttac atgcatttca
44401 gatttttgta ctagcaatta aaatatctac tggatgtaaa tcacatgtgc ttaatgcttt
44461 gttcataat atctgttgaa gtcaattaaa atatagagac agatctttta attgaacatg
44521 ttttatttgg gaagcaagaa ttaaatttga ggcatataca cagactgggt gtccttggtta
44581 tctctgaaga acaaagagaa gtttggaggt tatagaaaaa ggaaaatgtg acattgtttt
44641 tccagaaagt tctttggcac tagtaaatth tggggagttg gaagctctga tgggttagtg
44701 actgtggtgg gtaaaaactag tcttagagtc acaacagggt gtttcagtat ctattagata
44761 aacaggttt taggttacia taggcagttt cagcagctag gcttgcagaa aattacattc
44821 ttagagtaat gtatgtgcc ttgagtgctt tttcccctt ggcccttgac tctgatttag
44881 ttgggtatga caagaattat caatttatat aattactttt tacatattga agctgaatag
44941 gttttcttaa aacttgaaa tgggaaatac tgggtcttgt gaagttttag tgtgaaaacg
45001 ataaactagtc tcttatttca tgctctttgt aacaagtcta cagtaatacc taatgtatct
45061 agatgacacc tccagaaccag gagggaaacaa aaaagacctc tgagcagtc aataatgtct
45121 ataagcatgt attccagctt actttcggca tttctgtgga gtgcaggagg ccacattttg
45181 tccatagatc cagtttgaca agcttgggta ctgagttaaa gtgaaaatgg tgtaaataag
45241 taatcatatt cacatgacag taggtggaag tgacagctga caatctgaaa gagtggacaa
45301 aactataaaa attagaacta agaactctta aaatagaacg gtttgaagt tgttacagaa
45361 gggagcagct ttatgcttca gtggactctg aaggtattgg cagtgtatag tactgcttag
45421 tcattgattt aaattcggta tatatctctt ctattgctgt catgtacttg acattctgct
45481 ggggtgctaag gctgtctgca ggctactaat atgcataata acaatcctga aaaagaagga
45541 aaagtatact gtgccttact gaagaaggca ggacagccgt tggattttgt tagagtaaat
45601 attagttatc ttacataaag catgttatat tcctgatgt cagggcctga taaatgagcc
45661 cttacactct tgatagtcaa tctgtgccac tgttgctgtg tttgtatggt acaccatttc
45721 ctgtccatgt aacagttaaa ctgtatcaca tatctgttcc tactaaacta tttgcatata
45781 attttaacat ttgagtggtc gtatataaag ctaaaagttc tttataagat ttatagcatc
45841 ttagaatggt taaattagat aacattagtg tgccttttagt ttttgaattt aattttgctc
45901 ttgattttgt ttgtgttaat gtagactttg tctacgtaag cttgagccca actttggagt
45961 ggtgttttca gtgatggaag taactggaaa taactcatga aaccacttag tacttttgat
46021 agtttattcc catgaaggat caaattttta cttgagtcac taatataaaa atttaaaaga
46081 catgtcagat tttattaagc atggatttta aatatataaa tattagaaga cctaaacaaa
46141 atcgctaatt aaagagtaaa acatgtccct gcctatcata ctcccttcac tttcactgat
46201 ttctgctttt atgaagtact ttaataagct ctacaacaaa taacaagac attgtgcctc
46261 attttacact ctagcagtggt ttttocattc caactaacta gattgggttt ataataatag

```

46321 catttaaact tacttagtta aaatgttata cattagcaac tgcaattaag gagctaagaa  
 46381 attcagctcg tatttattta tatgcatctt atccatagtt tctcacttgt tatattttgcc  
 46441 tactgatggc aaattgattt tttctgttcc aaaaatgtag tgttttgaga tttttggaga  
 46501 tgcaaaacag catcattttc aaattagatc acaaaacaatc ttacttgttg cagttgagac  
 46561 tagtaattga tcagtgaggt gaaaaaatta ggcaaaacgg tatcatcaaa attttctttc  
 46621 tttttttttt tgaacagag tattgctctt gtcgcccagg ctggagtgca atggcacgat  
 46681 ctacgctcag ctactgggg ccctaccta cgggattcaa gggattctcc tgcctcagcc  
 46741 tcctgagtag ctgagattac aggcgcatgc caccaagccc agctaatttt tgtattttta  
 46801 gtagagacag ggttttgcca tgttggccag gctggctctg aacttcagac ctcaagtgat  
 46861 tcacctgcct cagcctccca aagtgtctgg attacaggca tgaaccaccg tgcccgcccc  
 46921 aaattttctt ttaacttaaa gtgttaatgt ttgtttgttc ccaatatttt tatatatgtc  
 46981 aaggcttttt cattatatac aggcagctc tttggagttc tgcatagtgt ttcttgttta  
 47041 aaccacacct ataatgtacc atctacaatt tccaattctt taagacagag tgaaaaatta  
 47101 agacacctga agcaatctga gtgcggagtc ctaggcatta tgattttcct tgacactttt  
 47161 agggttcttt tatcacagtt tatcaaacac cttttttttt ttaacaaaaa acaaatttac  
 47221 aaaaactttc catgtattca acttagaatt taatgaaata gggttttttt ttttttggtg  
 47281 gtcatgtatc atcaactttc tttacattta attaaattaa tcaacaaaaa acatatagtt  
 47341 gacataaaca aatttgggac caagcactac tgactcttag taaacataca agtcaactgt  
 47401 tggtcagaaa gtgccttgat gctagagagt agcctgcaag ctgtaattat atatgggat  
 47461 tagggaaatga agaacagcct taatactatt gatcttttaa gtgaaggcca gcttagaag  
 47521 cttttacttg ttaaaaagct tcacagtttg tccttgtagt taatgcaatt gaagttgaat  
 47581 taacttttct taattttttt ttttagggttt ctatcttact aaaggatat tcagaaaaatc  
 47641 tatattcact gaggaggatg ataattgggt ctactaacat tgagactgaa ctgaggccca  
 47701 gcaataattt aaacttatta tcctttgaag attcaactac tgggggagta caacagaaac  
 47761 aaattagaga acatgaagtt ttaattcacg ttgaagatga aacatgggac ccaacacttg  
**E9** 47821 atcatttagc taaacatgat ggagaagatg tacttggaaa taaagtggaa cgaaaagaag  
 47881 atggatttga agatggagta gaagacaaca aattgaaaga gaatatggaa agagcttgtt  
 47941 tgatgtogtt agatattaca gaacatgaac tccaaaatttt ggaacagcag tctcaggaag  
 48001 aatatcttag tgatattgct tataaatcta ctgaggtact aaataaagag gaagcacatt  
 48061 tttagttatt agtaggttct ggcagacttt attcccgtaa agagacagat agtaaatttt

**c.1982-297A>G (Registry#CB4 and CB6)**

63421 tccttgagat gattgttttc tttattgtta atatgtttcc ctctctgttt tttttttttt  
 63481 cttttttctt ttgtttgttt ttacagaggt aaataaccgga ttgtatacgt aactccagaa  
**E17** 63541 tactgttcag gtaacatggg cctgctccag caacttgagg ctgatattgg taagtataaa  
 63601 agaagatct ctgtaaatatc ttactgagtt aatattttaa gttaaacccta tggatggaca  
 63661 ctggatttca cttctgttaa agtttatttc aaacattact tcctccagga aatctctgac  
 63721 tctctaactt gctgtttcac ctatcttacc ccatgatact ctataattcc ttttgctata  
 63781 gaaattagtc tctgttatca taattacctg tttatataatc tgttttcttc tgctaggcta  
 63841 taaacttttc aagggaaaaa tatcactttt taaaatttat gtttcccagcag tgcagtgtct  
 63901 ggcataatagc cacttaaaaa tattgttgaa tgaatgttga atcctaggtt ctgtgaaatt  
 63961 ttaatttact tgtttttcat gttctgtatc taaataaagt cagtgtagtg gttttgtacc  
 64021 ctctttgttc ataagaatca cttttcaaac tttaaaaaaa atgtaggtaa ccaacaccca  
 64081 actctgaaaa ttctgattta acaggcctgg gttggcacct ggcattgggtg gtttctcaca  
 64141 ggtgattctg atatatagcc cgggttgga accacagtac ctttgattag ttgccactag  
 64201 tgagtatgat ttattacaaa aaccaaaaaac ttagataagt cacagtttat ttctagaac  
 64261 gtgtaaatat agaattagtc aaaagctgat agcacttttt ttgtacttaa aaatatttta  
 64321 agcctcagta tagtgagacc tcatctctac aaataatttt ttaaaaaatt ggccgagcct  
 64381 ggtggtgcat gcccatagtc caagctactt gggaggctga ggtaggagga ttgtttgagc  
 64441 ctgggagatg aaggctgagg tgagccaaga tcatgctact gcaactccatc ctgggcaaca  
 64501 gagcgagacc atgcctcaaa aaaaattttt ttttcttctt ggtgggttag ctttaactatc  
 64561 caagaattgc aatcatggct tctattgcaa atgcccctat ttcccacctt cagttggcct  
 64621 aaccaaaattt aatttttcaa tatcatatga tctttttgta taattatgta ttcaaataat  
 64681 tccagatagg ttaggttttc gaattgcaac gtctcattta atggttactt tcatataact  
 64741 tagggaaagc atttgataat ttttocaaca atgtaatgaa acaaaacttg tatctttttt  
 64801 attatgtgtt aaaaccaaca aaagaatgag ggcagcaatt aacatttcat taaatatatt  
 64861 agcaatgagt acatttatga gctcttaaac tcccttattg acatactgta ttttttgctc  
 64921 ttaatggaca atgaatttga tatgtttcct aatagggtgt atgaagttat tgtgaatatt  
 64981 tcaactttgga ttaagaataa ctaccctata tataaatttc atgggttgat tgcaaaagct  
 65041 ggggtctatg tccatagtggt tttgggtacg tttttactat ttgctttgtt tctgtgatag  
 65101 tgtaaatga ataataagct taagtattta agcaaaact taatacttct gacaagtagt  
 65161 tagaactctc tatttttgtt tttttgtaat ggatgagtta tggacactgc aattattaga

```

65221 gcagcgtact ttgcttatga tggatgaaaa tgttctctgg ttgactcagt gttgaataaa
65281 aaggataca tgaataaaaa attatTTTTTg aaatattttc ctttgccttt tgttgcggga
65341 aattgtacaa tgcttgcaaa aatgaatata cgcaggatat tatttgtaca gcagctcgac
65401 atttagctaa tcagattcct catTTTTtagg taaatgttaa attacttaag tagtctggat
65461 ttttaacaga aacagcaaac atagTTTTat agggaggctc cttaccaacc agacttttaa
65521 cttaagtgaa tgttggcaaa agcttTgcta aactgatttc cagggataag gtttagctcc
65581 attaaaagct agtttgtaa acctgtaact aaagctTTTT aaaaaatgaa agttttaaaa
65641 gagaccatca ttctgtttta acctatttaa tttaaaatct gggctgaagt aggagtattg
65701 cttgaacca ggagtTCgag accagcctgg gcaacacagt gagaccccat ctctgaaaaa
65761 aaaaaatgag ctgagcatgg tacctgttac agtgctagtt atgaaagaaa gaaagagaga
65821 gagagagaag gaaggaaggg agaaaggaag gaaggggctg ggagtgggtg ctcacacctg
65881 taatcccagc actttgggag gccgagggcg gtggatcatg aggtcaggag atcagacca
65941 cctggcgaa catggtgaaa cctgtctct actaaaaata caaaaagaaa aaattagccg
66001 ggcatggtgg tgggtgcctg tagtccagc tactggggag ggtaaggcag gagaatggca
66061 tgaaccoggg aggcagagct tgcagtgagc cgagattgag ccactgcact ttagcctaag
66121 aaaaggaag aaggaaggaa ggaaggaag aaggaaaaat cagtcactca ctcaggTTta
66181 gtttcaaaag ccaaaacagt gataatattg aattTTTTcc agccactcag tagtaccag
66241 agaattttga tacaataaac tgactTTTgac cccatgttta gtaggttttt tttttgtttg
66301 tttgtttggt tttttttttt gtctttcttc tccacactct cttaggactg ttgtagtctg
66361 taatgttagt gaattgtaat tgtttatttg catgtctgtc tcctctTTta gaattgtgaa
66421 ctctcaggt catggattgt attttattag tctttttatt cctagaaaag tgtttggata
66481 ataatagata tttattaacc ataataggag tagtagcatt tttgtgtgtg tgtgccaggc
66541 cctatttttag cattttatgt gaatgatata atttaatttt tagagcatct agaaaatgtt
66601 aggtaccatt attatccaca ttttacttgt gagaggactg agacttgtaa agcttaagta
66661 acttgcttaa ggtaatacac atggcagatg gtggagccag gttctgcatc tgggcagtct
66721 gactttagag ctttttaatc atcctcctcc tagtgtccga acattattaa tgctcagaga
66781 agtatcaaag aatgatgata ctcatggagg gaaaaaatta ttcttaagta tcaatttTtt
66841 aattgaggac aaaagcacta ctgttactac tgtgaaaaat ctgaaaacat tgtcacggat
66901 gattttacaa taacatcctt ttctgacatg cattacaaca cactattgat tccgtttcaa
66961 tgtttTgtg tcgtatgggg gcggagtaga gaggctacta caggaagaaa gaacaaataa
67021 catttcttct tactactttg tgcacatgag gatTTtagctc ctcccatacc attttacatt
67081 agaaaatgtg gctgtctctc tgtgtctag tactggcatt tcagaggact ctttgcataa
67141 tgatagtga tcaatcatgg atggcagatg agttaaatttc agtagaaatt tgctcactct
67201 tttatctct tttaatagct aatgcatgag ataaaattga aggtattacc aaggagaaat
67261 gcaggtggat agttttggag gcaaagtcac agtTaaagcaat tcatctctcc aaggaatagt
67321 gatgaaagct gagatccaat aaatgtcttg tttggattaa tacataaata tttcctTTta
67381 aaattcttaa ggcttttatt catatatctc ccctctccct atttccaata atgatttttg
67441 gtgttaatat cgtgatattt atgctttctg ttttatagga accaaatact ttgattttgtg
67501 tatttatctt ccTTTggaga tgtagatgag tttattTTTT cctttcagagc tttatctttt
67561 cctttatgtg tttttctttt tttacagTta tcacgctcat tgctgtggat gaggctcact
E18 67621 gtattttctga gtgggggcat gattttaggg attcattcag gaagtTgggc tccctaaaga
67681 cagcactgcc aatgTtaagc tttgccaagt ctgatgtccc gaaattacat tcttaataag
67741 gagagcattc aggattgggg agtggtaaag aagctgaaga cttcactata aaagagcaaa

```

**c.3234-170A>G (Regitsry#BIA1010, BIA1020**

```

108361 ctgtttgact taattttggt tcccactcca cattaaaaga tcctTTTTgc ttttaatagg
108421 gtagaaattg gcttcataaa gctaatacag aatctcagag cctcatcctt caagctaattg
E26108481 aagaattgtg tccaaagaag ttgcttctgc ctaggttcat ttttcagttt ttttcttgta
108541 actctctgat tttttgttgc tatttatgtg attcaaatta taccagtTTta taggcctctc
108601 acaagtaaaa tgaattacct gtttgttttt gtatgcctat ttttagtcagt ttgggggaag
108661 ggatctgtga gaaaggata agtcatagag cacttttctt ttttaagaga cagagtctct
108721 ctgtgttgct caagctggag tgcagtgggt cgatcatagc ttactgcagc ctcgatctcg
108781 tgggcccaag taatcctcag ccacctgagt agatgggact acagacatgc actactatgc
108841 ccagctaata tattttaatt ttttTgatag agacagggct tctagtgtct tctaggctg
108901 cctctgaact cctgagctca agtgcctcct ctgectcagc ctoccaaact actgggatta
108961 caggcatgat ccaccgctcc cagccagaac attttcttgg ttgatgggaa gtagctgacc
109021 atggtattta gaaaacttct ttctcatcga ttaaagaagc agtactgaaa tcaatgcgga
109081 ggaatccata tatcatattt acttctgggt tgtagaagtg gaaagggaaT acattttgtg
109141 cttacttttt tgtacctTTta catgtgattg atcacttTgt agttttttct tTcaaacatc
109201 ttaaagcttc cagagctTTt tctagaaaaa aaaatcagtt ttaagaatca ccagttctaa
109261 aaggTtaata tcttattcat ctttctgaga atggagtatc atgattcatg aattagatc
109321 ttgcatctta acatttgaaa taatttaatt ttattatttt ttagttcgaa aactgtatct

```

**E27**109381 tcgggcacca aagagcattg ttataatcaa gtaccagttg aattaagtac agagaagaag  
109441 gtttgtttta aagaaattgt tctgatttat ttcattcttt attgattcaa attctgttta
